# Supplementary material for: Satb2 neurons in the parabrachial nucleus mediate taste perception
Source: Nat Commun. 2021 Jan 11;12:224. doi: 10.1038/s41467-020-20100-8 (PMC7801645; doi:10.1038/s41467-020-20100-8)
Supplement: Supplementary file 1 — Supplementary Information [file 41467_2020_20100_MOESM1_ESM.pdf]

## Supplementary Figure 1

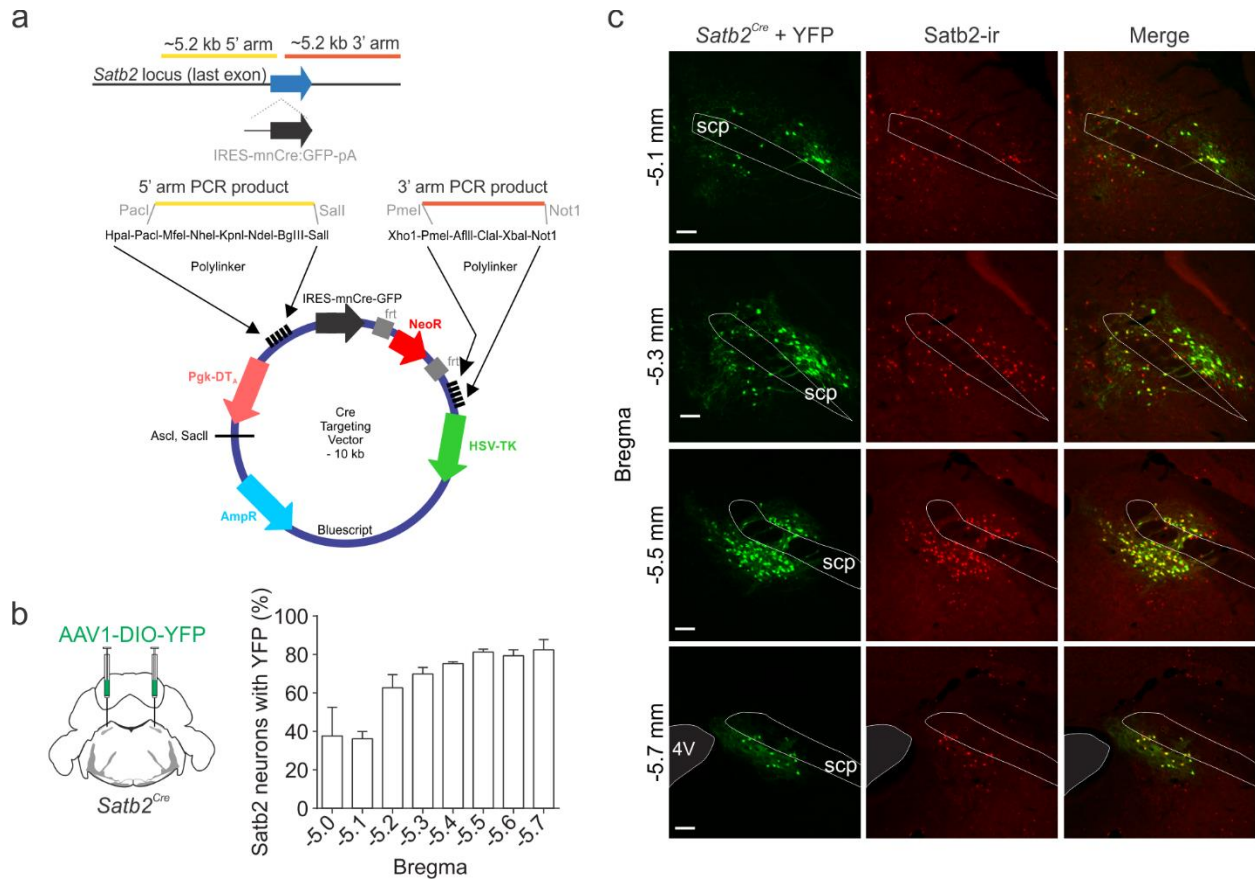

**Supplementary Figure 1: Generation of *Satb2*<sup>Cre</sup> mouse line.** **a**, Diagram for generation of the *Satb2*<sup>Cre</sup> mouse line showing: Top, the last exon of the *Satb2* gene (which has 11 exons), and the location of the IRES-Cre insert. Bottom, the targeting vector. **b**, AAV1-DIO-YFP injections into PBN of *Satb2*<sup>Cre</sup> mice and quantification of YFP expression in *Satb2* neurons across the rostral-caudal axis of the PBN (n=3). **c**, Representative images from brains counted in panel b of immunostaining showing colocalization of YFP in *Satb2*<sup>Cre</sup> in neurons (green) with Satb2-immunoreactivity (red) (n=3). Scale bar, 100  $\mu$ m. scp, superior cerebellar peduncle. 4V, fourth ventricle. Data are presented as mean  $\pm$  SEM. Source data are provided as a Source Data file.

## Supplementary Figure 2

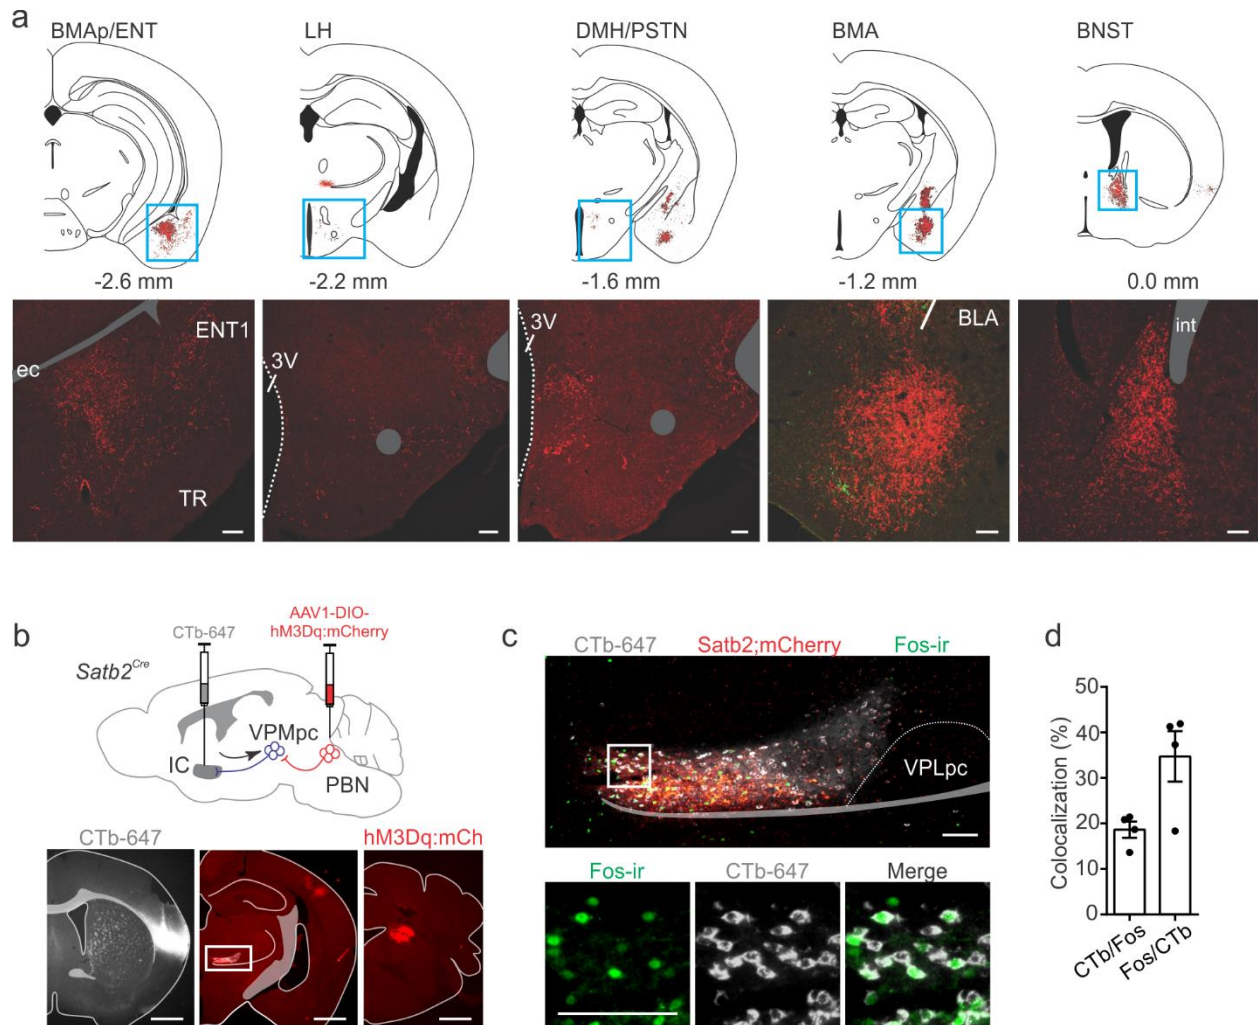

**Supplementary Figure 2. Downstream targets of *Satb2*<sup>PBN</sup> neurons.** **a**, Extension of Fig. 1b, where AAV1-DIO-Synaptophysin:mCherry was injected unilaterally into the PBN of *Satb2*<sup>Cre</sup> mice. Diagram of projections from *Satb2* neurons in the PBN with images of regions highlighted in blue. (n=3 mice). Scale bar, 100  $\mu$ m. **b**, Injection of the retrograde tracer cholera-toxin B subunit conjugated to Alexa Fluor 647 (CTb-647) into the IC and AAV1-DIO-hM3Dq:mCherry into the PBN of *Satb2*<sup>Cre</sup> mice (n=4 mice). Scale bar, 1 mm. **c**, Image of the VPMpc showing expression of CTb-647 from the IC, hM3Dq:mCherry projections from *Satb2* neurons in the PBN, and Fos induced by activating hM3Dq:mCherry with CNO. Scale bars, 100  $\mu$ m. **d**, Quantification of Fos and CTb-647 expression. Data are presented as mean  $\pm$  s.e.m. BLA, basolateral amygdala; BMA, basomedial amygdala; BNST, bed nucleus of stria terminalis; CeM, central medial nucleus of the amygdala; ec, external capsule; ENT1, entorhinal cortex; IC, insular cortex; int, internal capsule; LH, lateral hypothalamus; PSTN, paraventricular nucleus; Scp, superior cerebellar peduncle; TR, postpiriform transition area; VPMpc, parvocellular part of ventral posteromedial thalamus; VPLpc, ventral posterolateral thalamus, parvocellular part. 3V, third ventricle. Data are presented as mean  $\pm$  SEM. Source data are provided as a Source Data file.

### Supplementary Figure 3

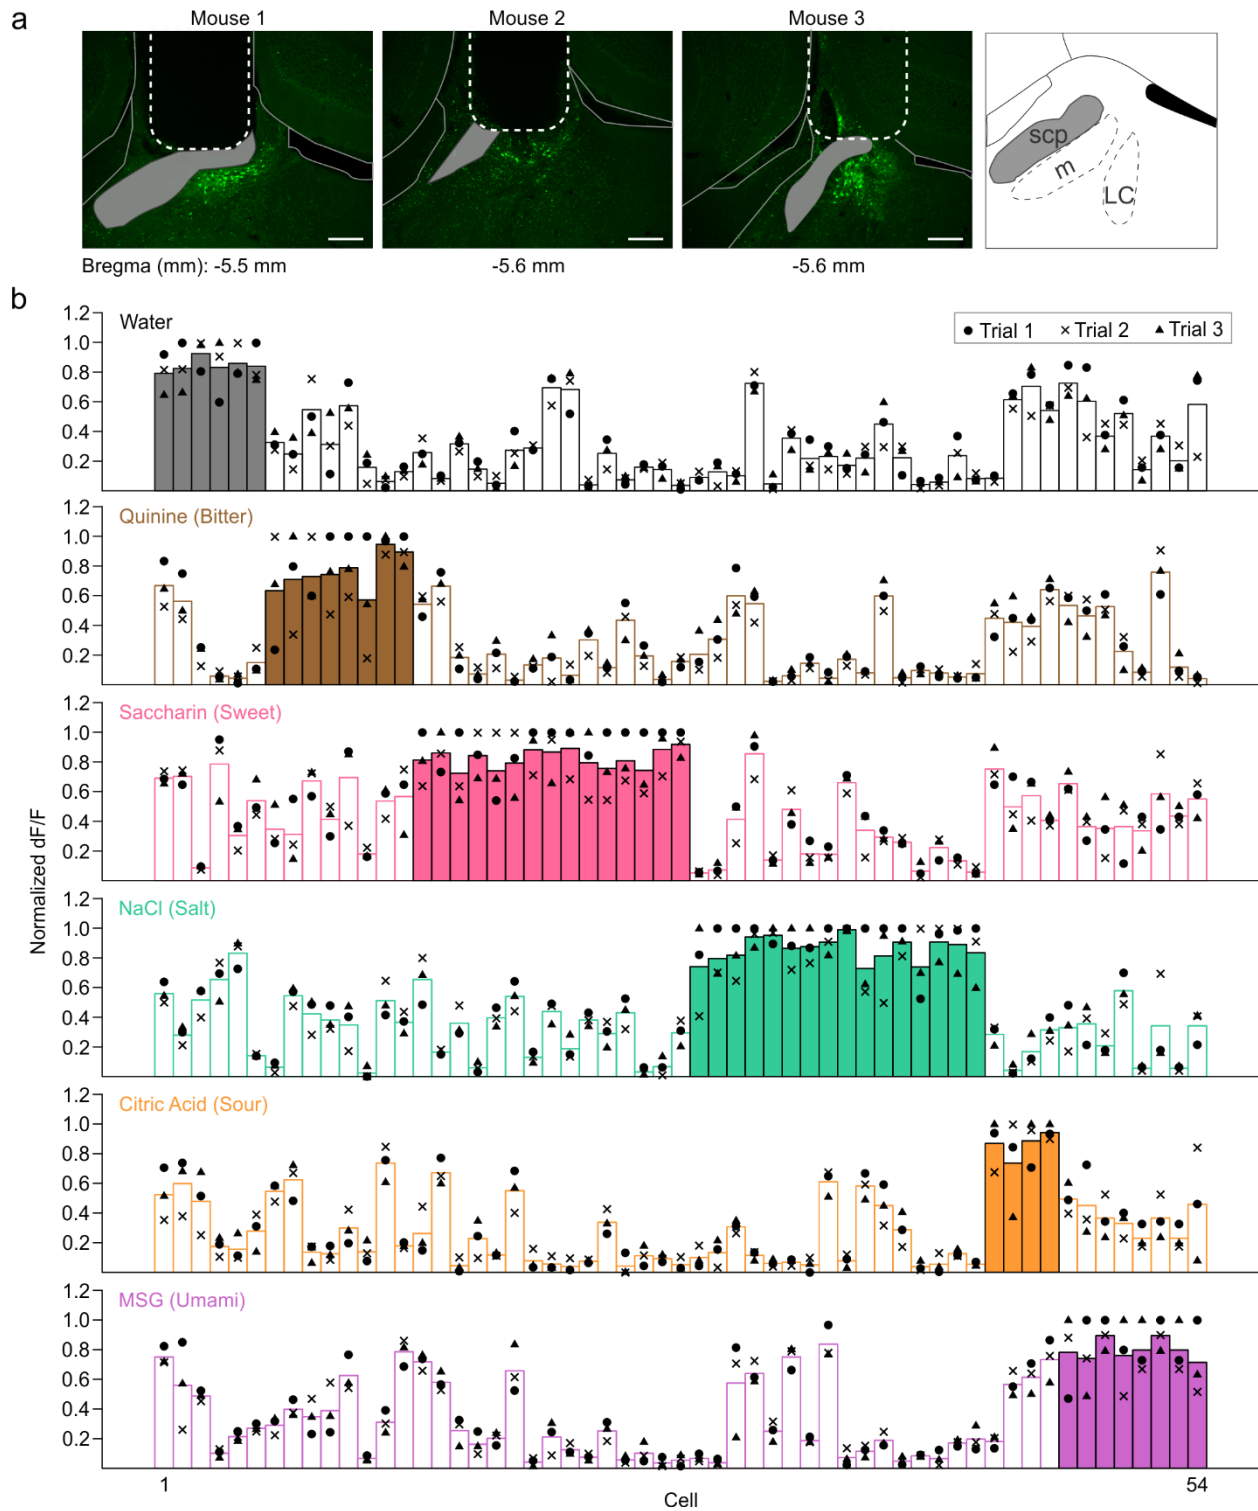

**Supplementary Figure 3. *Satb2* neurons respond to complex taste stimuli but not temperature or odor.** **a**, Representative images of *Satb2* neurons expressing GCaMP6s with approximate lens placement from each of the 3 mice used for imaging experiments (dotted lines). Scale bar, 200  $\mu$ m; scp, superior

cerebellar peduncle. m, medial parabrachial nucleus. LC, locus coeruleus. **b**, Expanded data from Fig 2e showing average responses of individual Satb2 neurons to different tastants across three trials with symbols representing responses from each trial. Source data are provided as a Source Data file.

## Supplementary Figure 4

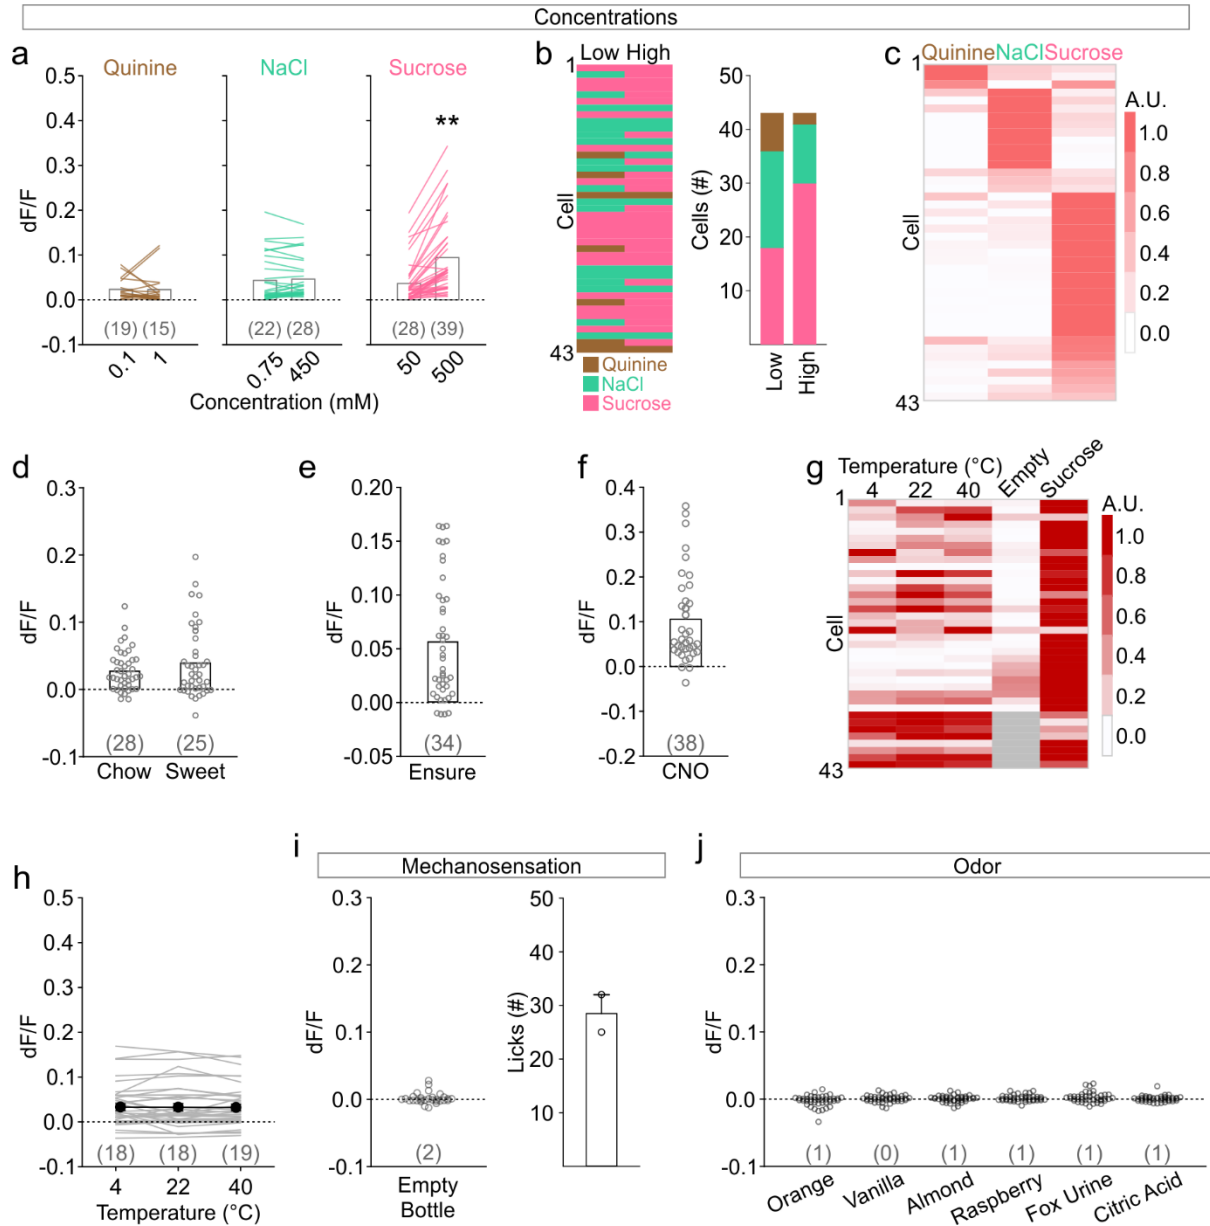

**Supplementary Figure 4. *Satb2* neurons respond to complex taste stimuli but not temperature or odor.** **a**, Responses of individual *Satb2* neurons to licking high and low concentrations of quinine, NaCl, and sucrose, normalized to the number of licks for each taste, data combined from 3 mice. For each taste, only neurons with a significant response at either concentration ( $>3$  SD) were included in the analysis. There was a significant increase in net average response of *Satb2* neurons to a high concentration of sucrose, but not quinine or NaCl (Quinine: Wilcoxon signed rank test,  $n=19$  cells from 3 mice,  $t(18)=-0.150$ ,  $P=0.883$ ; NaCl: paired two-tailed  $t$ -test,  $n=31$  cells from 3 mice  $t(30)=-1.234$ ,  $P=0.227$ ; Sucrose: Wilcoxon signed rank test,  $n=39$  cells from 3 mice,  $Z=5.247$ ,  $P<0.001$ ). **b**, The best response stimulus for each cell at low and high concentrations. **c**, The product of the normalized responses between low and high concentrations of each cell. **d-f**, Net average responses of *Satb2* neurons to solid food (**d**), a liquid food (**e**), and an injection of CNO to activate hM3Dq (**f**). **g**, Average

normalized responses to licking for water at different temperatures or an empty bottle compared to sucrose. **h-j**, There were no significant responses of Satb2 neurons during licking of water at different temperatures (Friedman test,  $X^2(2)=4.421$   $P=0.11$ ) (**h**) an empty bottle (**i**), normalized to number of licks, and odors presented on a cotton applicator (**j**). Numbers in parenthesis represent number of cells where the net average response  $>3$  SD from baseline  $*P < 0.05$ ,  $***P < 0.001$ . Data are presented as mean  $\pm$  SEM. Source data are provided as a Source Data file.

## Supplementary Figure 5

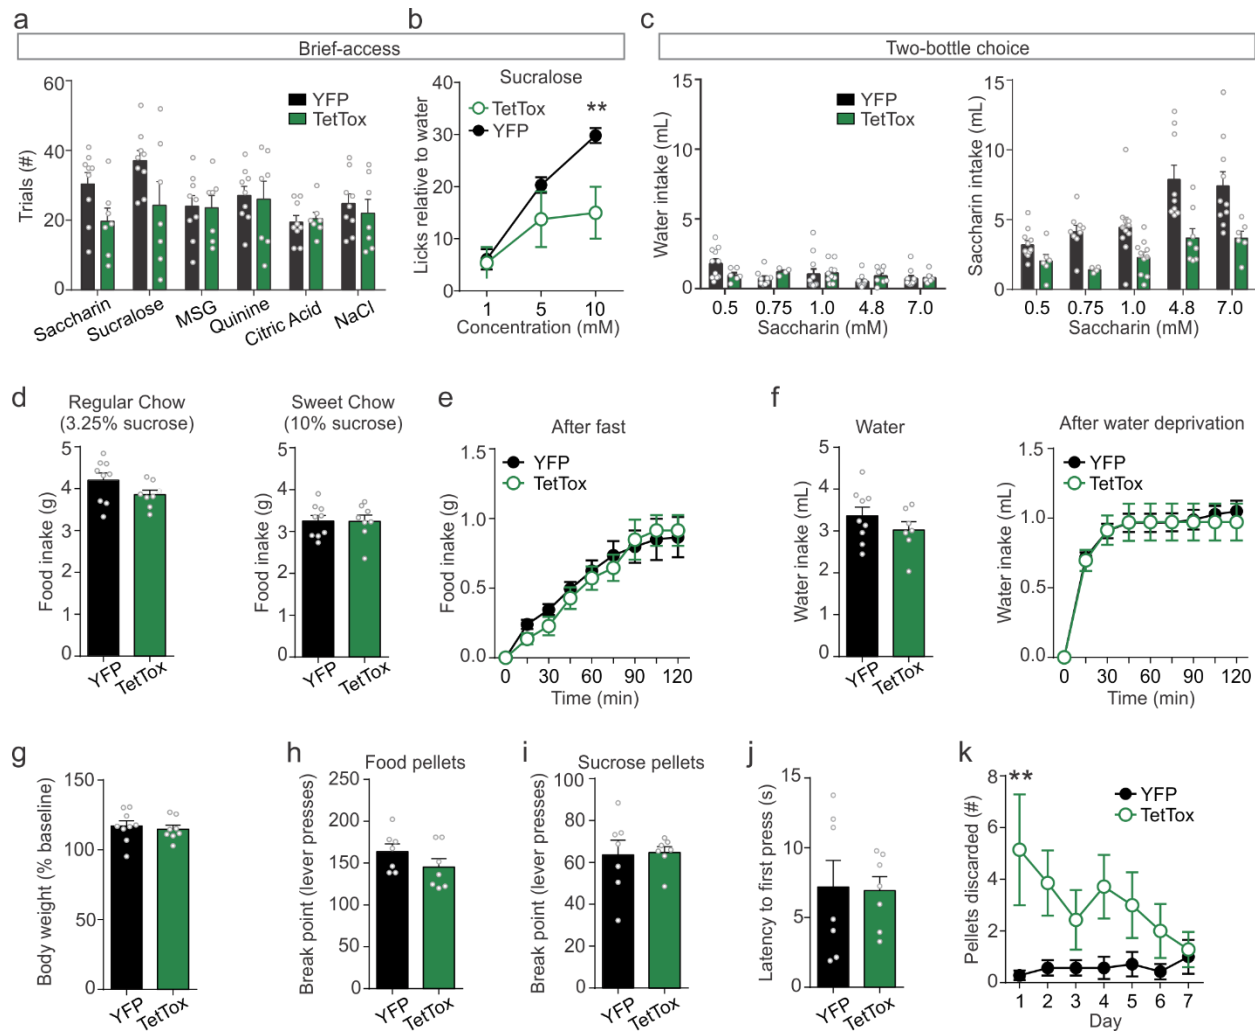

**Supplementary Figure 5. Inactivation of *Satb2* neurons has no effect on food or water intake.** **a**, There were no significant differences in number of trials completed during brief-access taste tests in Figure 3 between TetTox and YFP mice (YFP  $n=9$ , TetTox  $n=7$ ; multiple t-tests per row with Holm-Sidak correction for multiple comparisons). **b**, TetTox-expressing mice licked less for sucralose, an alternative sweetener, than control mice (YFP  $n=9$ , TetTox  $n=6$ ; two-way RM ANOVA, interaction  $F_{(2,26)}=8.871$ ,  $P=0.0012$ ). **c**, Volume of water and saccharin intake in two-bottle choice tests shown in Figure 3. TetTox-expressing mice drank less saccharin than YFP control mice (YFP  $n=9-11$ , TetTox  $n=4-10$ ; two-way ANOVA; water: group effect  $F_{(1,74)}=0.0424$ ,  $P=0.8374$ ; saccharin group effect  $F_{(1,74)}=37.02$ ,  $P=4.73E-08$ ). Exact  $n$  per group are provided in Supplementary Table 1. **d**, Mice consumed comparable amounts of regular chow and sweet chow over 24-h (YFP  $n=9$ , TetTox  $n=8$ , two-tailed unpaired t-test; regular chow:  $t(15)=1.67$ ,  $P=0.1157$ ; sweet chow:  $t(15)=0.0441$ ,  $P=0.9654$ ). **e**, After a 16-h fast, TetTox and YFP mice ate a similar amount of sweet chow during re-feeding (YFP  $n=5$ , TetTox  $n=5$ ; two-way RM ANOVA, interaction  $F_{(8,64)}=0.7556$ ,  $P=0.6426$ ). **f**, TetTox and YFP-injected mice drank similar amounts of water over 24-h and following 16-h water deprivation (24-h: YFP  $n=9$ , TetTox  $n=7$ , two-tailed unpaired t-test,  $t(14)=1.136$ ,  $P=0.2751$ ; water deprivation: YFP  $n=8$ , TetTox  $n=6$ ; two-way RM ANOVA,  $F_{(8,96)}=0.255$ ,  $P=0.9784$ ). **g**, There was no difference in body weight between the two groups 12-wk post-surgery (YFP  $n=9$ , TetTox

n=10; two-tailed unpaired t-test,  $t(15)=0.4845$ ,  $P=0.635$ ). **h**, In a progressive ratio task, hungry mice from both YFP and TetTox groups reached a comparable break-point for food pellets, averaged across 7 trials (n=7 mice/group, two-tailed unpaired t-test,  $t(12)=1.38$ ,  $P=0.1927$ ). **i-j**, In *ad libitum* fed mice, there was no difference in the break-point for sucrose pellets (**i**) or latency to the first lever press between groups (**j**) (sucrose: 7 trial average, Mann-Whitney test,  $U=21$ ,  $P=0.6894$ ; latency: two-tailed unpaired t-test,  $t(12)=0.117$ ,  $P=0.9088$ ). **k**, TetTox-expressing mice discarded more pellets in initial sessions than control mice (two-way RM ANOVA, group effect  $F_{(1, 84)}=22.41$ ,  $P=8.83E-06$ ). Post-hoc analyses were done with Holm-Sidak's multiple comparison test with  $*P < 0.05$ ,  $**P < 0.01$ ,  $****P < 0.0001$ . Data are presented as mean  $\pm$  SEM. Source data are provided as a Source Data file.

## Supplementary Figure 6

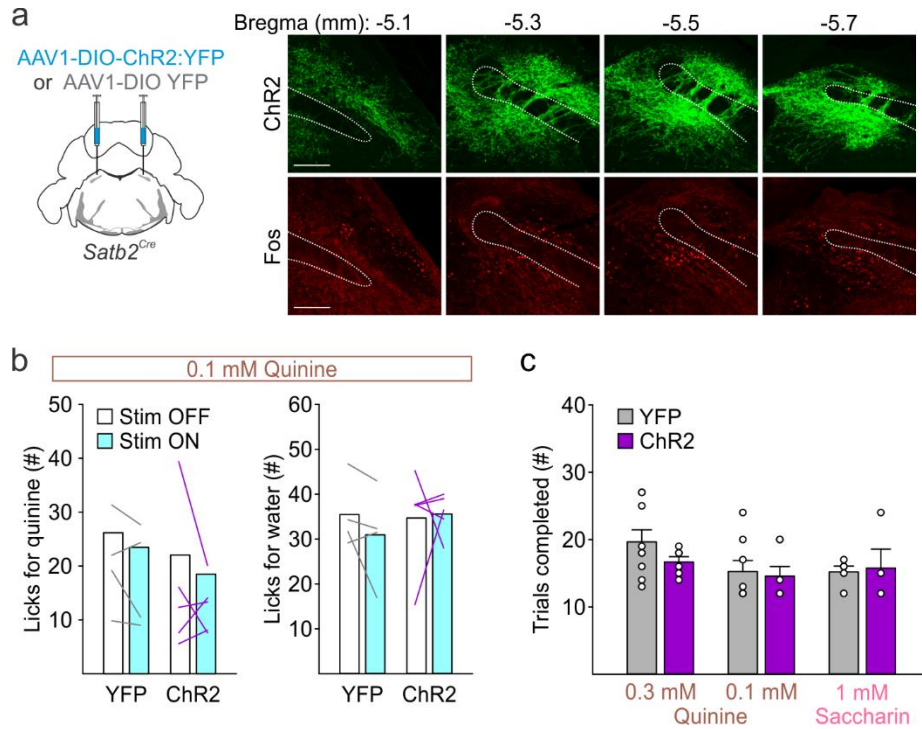

### Supplementary Figure 6. Photostimulation induces Fos in Sat2 neurons throughout the PBN.

**a**, Bilateral injections of AAV1-DIO-ChR2:YFP or AAV1-DIO-YFP into the PBN of *Satb2<sup>Cre</sup>* mice and representative image of viral expression and Fos induction throughout the PBN following photostimulation. Similar levels of Fos expression were seen in  $n=7$  mice. Scale bar, 100  $\mu\text{m}$ . **b**, Photostimulation had no effect on licking for 0.1 mM quinine solution or water (one-way RM ANOVA, quinine: interaction  $F_{(3,10)}=0.443$ ,  $P=0.727$ ; water: interaction  $F_{(3,10)}=0.227$ ,  $P=0.875$ ). **c**, There were no significant differences in the number of trials completed in the brief-access taste tests from Figure 5 between ChR2 and YFP mice (0.3 mM quinine: Welch's two-tailed t-test,  $t(13)=1.295$ ,  $P=0.218$ ; 0.1 mM quinine: Student's two-tailed t-test,  $t(7)=-0.185$ ,  $P=0.843$ ; 1 mM saccharin: Mann-Whitney  $U=26$ ,  $P=0.867$ ). Data are presented as mean  $\pm$  SEM. Source data are provided as a Source Data file.

## Supplementary Figure 7

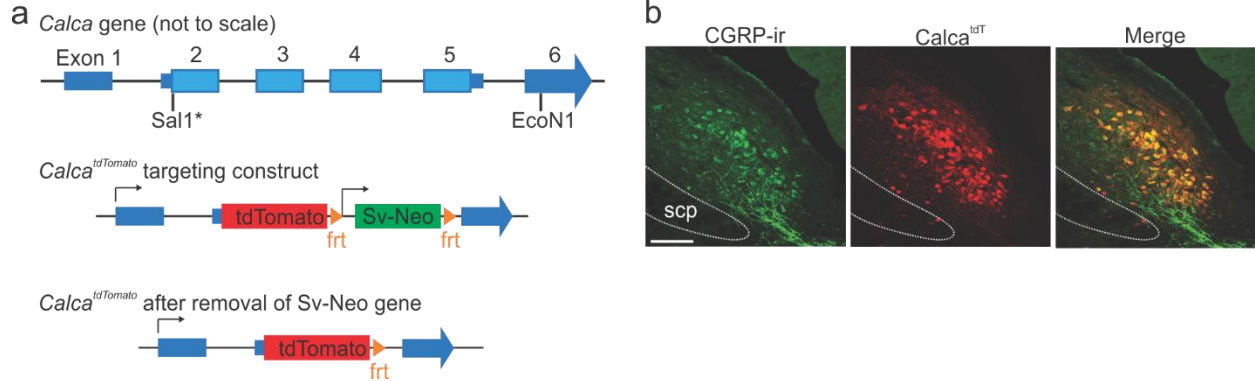

**Supplementary Figure 7. Generation of *Calca*<sup>tdT</sup> mouse line.** **a**, Diagram for generation of the *Calca*<sup>tdT</sup> mouse line showing: Top, the *Calca* gene and key restriction enzyme sites used for cloning. Middle, the targeting construct (inserted in the same vector shown in Supplementary Fig 1a). Bottom, the *Calca* locus after recombination and removal of the frt-flanked SV-Neo selection gene. **b**, tdTomato expression in the PBN of a *Calca*<sup>tdT</sup> mouse (red), with immunostaining showing co-localization with CGRP (green) (n=2).

**Supplementary Table 1**

|                               | YFP (n) | TetTox (n) |
|-------------------------------|---------|------------|
| Fig 3f: Bitter, 0.1           | 13      | 8          |
| Fig 3f: Bitter, 0.3           | 10      | 8          |
| Fig 3f: Bitter, 0.5           | 8       | 10         |
| Fig 3f: Bitter, 0.7           | 10      | 7          |
| Fig 3f: NaCl, 75              | 7       | 6          |
| Fig 3f: NaCl, 150             | 9       | 7          |
| Fig 3f: NaCl, 300             | 9       | 8          |
| Fig 3f: NaCl, 450             | 13      | 11         |
| Fig 3f; Citric Acid, 5        | 11      | 7          |
| Fig 3f; Citric Acid, 10       | 14      | 11         |
| Fig 3f; Citric Acid, 20       | 11      | 7          |
| Fig 3f; Citric Acid, 30       | 9       | 8          |
| Fig 3g; Saccharin, 0.5        | 11      | 6          |
| Fig 3g; Saccharin, 0.75       | 8       | 4          |
| Fig 3g; Saccharin, 1.0        | 10      | 10         |
| Fig 3g; Saccharin, 4.8        | 9       | 8          |
| Fig 3g; Saccharin, 7.0        | 10      | 6          |
| Fig 3g; MSG                   | 5       | 5          |
| Fig 3g; Sucrose               | 5       | 5          |
|                               | YFP (n) | TetTox (n) |
| Supplementary Fig 5c: 0.5 mM  | 12      | 6          |
| Supplementary Fig 5c: 0.75 mM | 9       | 4          |
| Supplementary Fig 5c: 1.0 mM  | 11      | 10         |
| Supplementary Fig 5c: 4.8 mM  | 9       | 8          |
| Supplementary Fig 5c: 7.0 mM  | 10      | 6          |

**Supplementary Table 1:** Animal numbers for Fig3 f-g, Supplementary Fig 5c.
